# Supplementary material for: Ag/SiO2: a novel catalyst with high activity and selectivity for hydrogenation of chloronitrobenzenes
Source: Royal Society of Chemistry journal article supplement (doi:10.1039/b509595f), 2005-01-01
Supplement: b509595f.pdf [file b509595f.pdf]

## Supplementary Information

### **Ag/SiO<sub>2</sub>: a novel catalyst with high activity and selectivity for hydrogenation of chloronitrobenzenes**

**Yangying Chen,<sup>a</sup> Chuang Wang,<sup>a</sup> Hongyang Liu,<sup>b</sup> Jieshan Qiu<sup>a\*</sup> and Xinhe Bao<sup>b</sup>**

<sup>a</sup> State Key Lab of Fine Chemicals, Carbon Research Laboratory, Center for Nano Materials and Science, School of Chemical Engineering, Dalian University of Technology, 158 Zhongshan Road, P.O. Box 49, Dalian 116012, China. E-mail: [jqiu@dlut.edu.cn](mailto:jqiu@dlut.edu.cn)  
Fax: +86-411-88993991

<sup>b</sup> State Key Lab of Catalysis, Dalian Institute of Chemical Physics, Chinese Academy of Sciences, 457 Zhongshan Road, Dalian 116023, China

#### **Preparation of Ag/SiO<sub>2</sub>**

The detailed procedure is as follows: first, 5.0 mL aminopropyltri-ethoxysilane (APTES) and 2.0 mL tetraethoxysilicate (TEOS) were added into 10 mL of a mixture water solution of ammonia (27%) and 20 mL deionized water, and after stirring at room temperature for 24 h the solution was evaporated at 80 °C. The obtained solid was further dried in air at 120 °C for 12 h, leading to aminopropyl-functionalized silica (denoted as NH<sub>2</sub>-SiO<sub>2</sub>). 2.0 g of the NH<sub>2</sub>-SiO<sub>2</sub> was added to 30 mL of an aqueous solution of HCHO (37%), which was stirred at 60 °C for 2h, filtered and dried in air at 120 °C for 3h, finally a white solid powder (denoted as CH<sub>2</sub>O-SiO<sub>2</sub>) was made. 1.0 g of CH<sub>2</sub>O-SiO<sub>2</sub> was suspended in a solution of 0.063g AgNO<sub>3</sub> dissolved in 40 mL deionized water, after being stirred at 60 °C for 2h, and following filtering and drying in air at 120 °C for 12h, a yellow powder of the Ag/SiO<sub>2</sub> catalyst was obtained. The loading of silver was found to be *ca.* 4.0% in weight. The catalytic properties of these Ag catalysts were compared with a silver catalyst supported on SBA-15 with ordered mesostructure and high surface area (700m<sup>2</sup>/g) that was prepared by a conventional impregnation method and reduced at 500 °C in H<sub>2</sub> (denoted as Ag/SBA-15-imp).

## Test of Catalytic Properties

The catalytic reactions of CNBs were carried out in a Parr autoclave, of which the products were analyzed using a gas chromatography (Agilent 6890N) equipped with an SE-54 capillary column and an FID detector.

**Table S1** The catalytic recycle properties of Ag/SiO<sub>2</sub>-200 catalyst for selective hydrogenation of o-chloronitrobenzene

| Cycle | Conversion (%) | Selectivity (%) | Cycle | Conversion (%) | Selectivity (%) |
|-------|----------------|-----------------|-------|----------------|-----------------|
| 1     | 100            | 100             | 4     | 99.0           | 100             |
| 2     | 98.8           | 100             | 5     | 99.2           | 100             |
| 3     | 98.8           | 100             | 6     | 99.3           | 100             |

Reaction conditions: 0.1g of the catalyst, 0.5g of the substrate and 25 mL of ethanol, H<sub>2</sub> pressure 2.0MPa; reaction temperature 140°C; reaction time 3h.

**Table S2** Selective hydrogenation of various chloronitrobenzens over Ag/SiO<sub>2</sub>-200 catalyst

| Entry | Substrate                                                                           | Product                                                                             | Conversion (%) | Selectivity (%) |
|-------|-------------------------------------------------------------------------------------|-------------------------------------------------------------------------------------|----------------|-----------------|
| 1     | 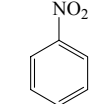   |    | 93.9           | 100             |
| 2     |    |    | 100            | 100             |
| 3     |    |    | 100            | 100             |
| 4     |    |    | 100            | 100             |
| 5     |  |  | 100            | 100             |
| 6     |  |  | 100            | 100             |
| 7     |  |  | 100            | 100             |

Reaction conditions: 0.1g of the catalyst, 0.5g of the substrate and 25 mL of ethanol, H<sub>2</sub> pressure 2.0MPa; reaction temperature 140°C; reaction time 3h.
